# Supplementary material for: Technical note: The Linked Paleo Data framework – a common tongue for paleoclimatology
Source: Copernicus journal article supplement (doi:10.5194/cp-12-1093-2016), 2016-04-29
Supplement: Supplementary file [file cp-12-1093-2016-supplement-title-page.pdf › cp-12-1093-2016-supplement-title-page.pdf]

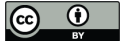

## *Supplement of*

# **Technical note: The Linked Paleo Data framework – a common tongue for paleoclimatology**

**Nicholas P. McKay and Julien Emile-Geay**

*Correspondence to:* Nicholas P. McKay ([nicholas.mckay@nau.edu](mailto:nicholas.mckay@nau.edu))

- [cp-12-1093-2016-supplement-title-page.pdf](#)
- SuppData
  - .DS\_Store
  - RAPiD-12-1K.Thornalley.2009.chronTable.ChronTable.csv
  - RAPiD-12-1K.Thornalley.2009.dataQC.PaleoData.csv
  - RAPiD-12-1K.Thornalley.2009.jsonld

The copyright of individual parts of the supplement might differ from the CC-BY 3.0 licence.
